# Supplementary material
Source: PubMed Central journal article supplement (PMC5530330)
Supplement: annrheumdis-2016-210242supp002.pdf [file annrheumdis-2016-210242supp002.pdf]

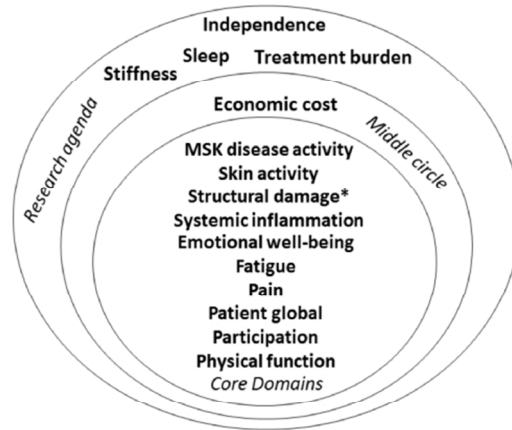

Supplemental Figure S1. Proposed updated psoriatic arthritis core domain set at the conclusion of the nominal group technique meeting with patients and physicians: MSK (musculoskeletal) disease activity includes peripheral joints, enthesitis, dactylitis and spondylitis; skin activity includes skin and nails; patient global is defined as patient reported disease related health status; participation (e.g. family roles, social, leisure, work/employment); emotional well-being (e.g. depressive mood, anxiety, embarrassment, self-worth, frustration, stress); structural damage\* should be measured at least once during a drug development program for PsA;

Figure S1
